# Supplementary material for: Synthesis of LiMnPO4/C with superior performance as Li-ion battery cathodes by a two-stage microwave solvothermal process
Source: Royal Society of Chemistry journal article supplement (doi:10.1039/c5ta02653a), 2015-01-01
Supplement: c5ta02653a1.pdf [file c5ta02653a1.pdf]

## Supporting information

### Synthesis of $\text{LiMnPO}_4/\text{C}$ with superior performance as Li-ion battery cathode by a two-stage microwave solvothermal process

Jian-Nan Zhu, Wen-Cui Li, Fei Cheng and An-Hui Lu \*

State Key Laboratory of Fine Chemicals, School of Chemical Engineering, Dalian University  
of Technology, Dalian 116024, P. R. China

E-mail: anhuilu@dlut.edu.cn, Fax: (+86)-411-84986112

**Table S1.** Synthesized samples used in this study.

| Sample    | Synthesis temp. / °C                               | Synthesis time / min |
|-----------|----------------------------------------------------|----------------------|
| MW-160-03 | 160                                                | 3                    |
| MW-160-10 | 160                                                | 10                   |
| MW-160-30 | 160                                                | 30                   |
| MW-180-10 | 180                                                | 10                   |
| MW-200-10 | 200                                                | 10                   |
| LMP/NC    | C-coated MW-160-10 using dopamine as carbon source |                      |
| LMP/C     | C-coated MW-160-10 using glucose as carbon source  |                      |
| Pure-LMP  | Pure MW-160-10 without a carbon coating            |                      |

**Table S2.** Elemental analysis results.

| Sample      | Element content |         |         |
|-------------|-----------------|---------|---------|
|             | N (wt%)         | C (wt%) | H (wt%) |
| LMP/C       | 0.05            | 7.98    | 0.33    |
| LMP/NC      | 1.18            | 5.97    | 0.40    |
| MW-160-03/C | 1.12            | 6.18    | 0.22    |
| MW-160-30/C | 1.07            | 5.37    | 0.19    |
| MW-180-10/C | 1.10            | 5.45    | 0.20    |
| MW-200-10/C | 1.08            | 5.97    | 0.23    |

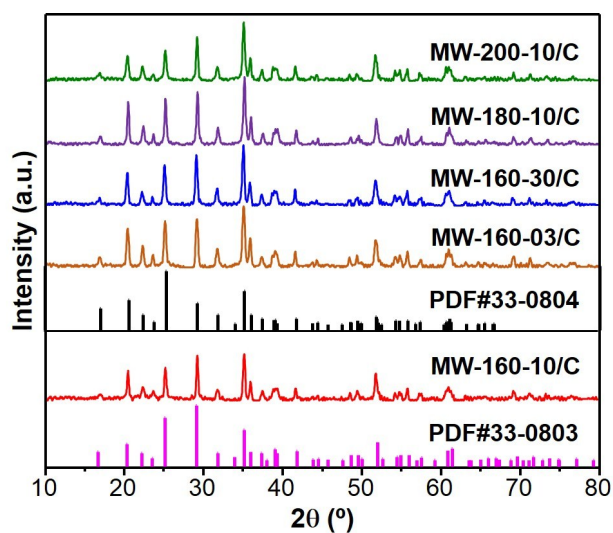

**Fig. S1.** Powder X-ray diffraction patterns of the carbon-coated  $\text{LiMnPO}_4$  obtained under different conditions.

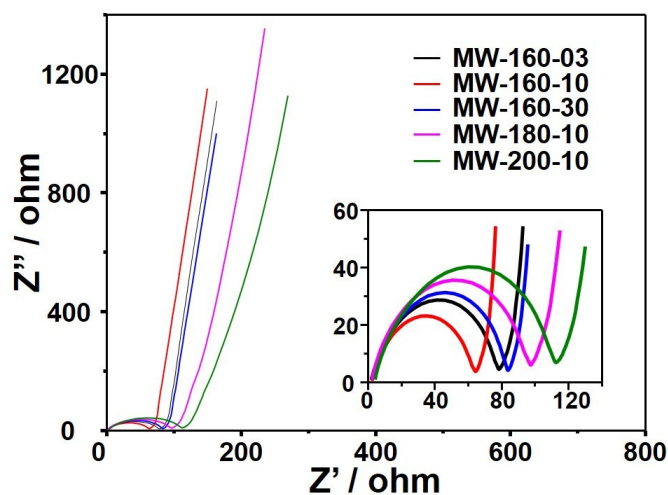

**Fig. S2** The impedance spectra for samples under different condition assembled in coin cell.

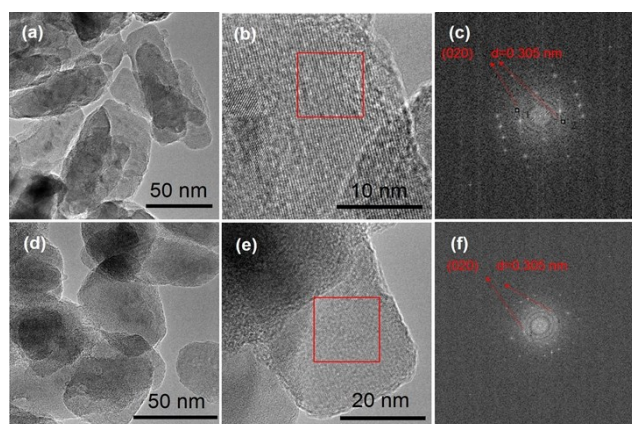

**Fig. S3** (a-c) the TEM and FFT of sample MW-160-03/C, (d-e) the TEM and FFT of sample MW-160-30/C.

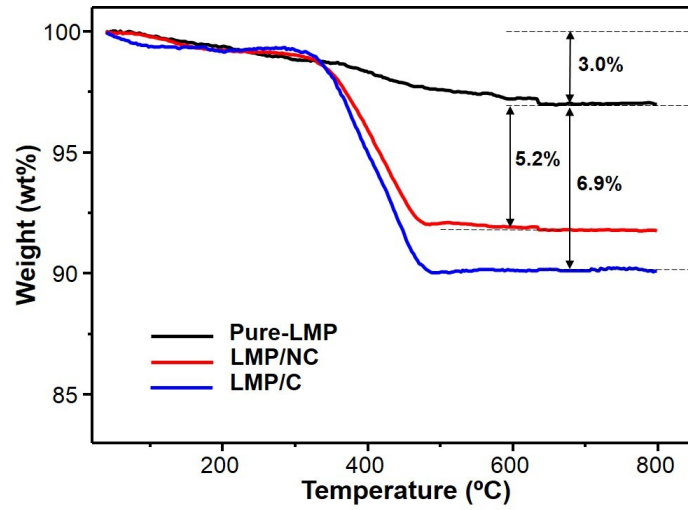

**Fig. S4.** The TG analysis results.

#### Calculation of the carbon content

For the sample of LMP/NC, there is 91.8 wt% of residue after pyrolysis at 800 °C in air, and for the pure LMP, it is 97 wt%.

By assuming that the carbon content is x.

$$(1-x)*0.97+x*0=0.918 \quad \text{Thus, } x=5.4\%.$$

So the carbon content of the three samples are separately 5.4 wt% ( LMP/NC), 7.1 wt% ( LMP/C), and 3 wt% ( Pure-LMP).

#### Lithium ion diffusion coefficient:

$$D_{Li^+} = \frac{R^2 T^2}{2A^2 n^4 F^4 C^2 \sigma^2} \quad (\text{Eq. S1})$$

The lithium ion diffusion coefficient ( $D_{Li^+}$ ) has been calculated for all samples using the **Eq. S1**, where R is the gas constant, T is the absolute temperature, A is the contact area of the electrode (2.01 cm<sup>2</sup>), n is the number of electrons per molecule, F is the Faraday constant, C is the concentration of Li<sup>+</sup> ions (6.38×10<sup>-3</sup> mol cm<sup>-3</sup>, ratio between the tap density of the prepared material and molecular weight) and σ is the Warburg coefficient associated with the slope of the linear fits between  $Z_{re}$  and the reciprocal square root of the angular frequency in the low frequency region.

**Table S3.** Comparison of the electrochemical data of LMP in literature

| Synthesis process             | Cycle performance                                                            | Rate performance                                           | Reference                                |
|-------------------------------|------------------------------------------------------------------------------|------------------------------------------------------------|------------------------------------------|
| Solvothermal method           | Charge 0.5 C<br>Discharge 0.5 C<br>134 mA h g <sup>-1</sup> after 100 cycles | Charge 10 C<br>Discharge 10 C<br>108 mA h g <sup>-1</sup>  | Journal of Materials Chemistry A<br>[16] |
| Solid state reaction          | Charge 0.02 C<br>Discharge 0.2 C<br>130 mA h g <sup>-1</sup> after 50 cycles | Charge 0.02 C<br>Discharge 10 C<br>35 mA h g <sup>-1</sup> | Nano Letters<br>[33]                     |
| Impregnation                  | Charge 0.1 C<br>Discharge 1 C<br>155 mA h g <sup>-1</sup> after 50 cycles    | Charge 0.1 C<br>Discharge 10 C<br>110 mA h g <sup>-1</sup> | Advanced Energy Material<br>[40]         |
| Ultrasonic spray pyrolysis    | Charge 0.05 C<br>Discharge 0.5 C<br>130 mA h g <sup>-1</sup> after 50 cycles | Charge 0.1 C<br>Discharge 10 C<br>58 mA h g <sup>-1</sup>  | Advanced Functional Material<br>[41]     |
| Microwave solvothermal method | Charge 0.5 C<br>Discharge 0.5 C<br>154 mA h g <sup>-1</sup> after 100 cycles | Charge 10 C<br>Discharge 10 C<br>118 mA h g <sup>-1</sup>  | This work                                |

**References:**

40. H. Yoo, M. Jo, B.-S. Jin, H.-S. Kim and J. Cho, *Adv. Energy Mater.*, **2011**, 1, 347–351.  
41. S.-M. Oh, S.-W. Oh, C.-S. Yoon, B. Scrosati, K. Amine and Y.-K. Sun, *Adv. Funct. Mater.*, **2010**, 20, 3260–3265.
